# Supplementary material
Source: ML conference proceedings conference paper supplement (https://openreview.net/forum?id=kP92Fyc6ry)
Supplement: supplementary_material [file attachment]

## 532 **A Data and Software Availability**

### 533 **A.1 Data Availability**

534 CryoBench datasets are deposited on Zenodo at DOI: 10.5281/zenodo.11629428. We include the  
535 downsampled images ( $D = 128$ ) analyzed in this study in `.mrcs`, `.txt`, and `.star` file formats,  
536 along with CTFs and pose data in pickle files. We also include the consensus volume and mask  
537 used for FSC computation. Full resolution images ( $D = 256, 384$ ) and ground truth PDB files and  
538 volumes will be deposited to EMPIAR [42]. We provide the datasets under the Creative Commons  
539 Attribution 4.0 International license.

### 540 **A.2 Software Availability**

541 Scripts for simulating cryo-EM images and computing metrics are available at <https://github.com/ml-struct-bio/CryoBench>.  
542

## 543 B Dataset Design

### 544 B.1 Generating IgG-1D

545 Starting from an atomic model of the human immunoglobulin G (IgG) antibody (PDB: 1HZH),  
546 conformational heterogeneity is produced by rotating a dihedral angle connecting one of the fragment  
547 antibody (Fab) domains (Fig. 2(a)), simulating a simple one-dimensional continuous circular motion.  
548 Specifically, we rotate the backbone  $\psi$  angle of residue 230 in the heavy chain H. This process  
549 yields 100 atomic models approximating the continuous dihedral rotation (360 degrees, 3.6-degree  
550 intervals). For each atomic model, the `molmap` command in ChimeraX [43] was used to generate the  
551 corresponding density volume at a resolution of 3 Å with a bounding box of dimension  $D = 256$   
552 pixels and a pixel size of 1.5 Å. Poses in Eq. 1 were uniformly sampled from  $R \in SO(3)$  and  $t$  was  
553 sampled uniformly from  $[20, 20]^2$  pixels. For the CTF, the accelerating voltage was set at 300 kV,  
554 spherical aberration at 2.7 mm, and amplitude contrast at 0.1. Defocus parameters were sampled  
555 from EMPIAR-11247 [44]. Noise was added at a signal-to-noise (SNR) ratio of 0.01. See Section  
556 B.6 for a definition of the SNR. We simulate 1,000 images for each conformation to produce a dataset  
557 of 100k images. The dataset is then downsampled to  $D = 128$  by Fourier cropping.

### 558 B.2 Generating IgG-RL

559 For IgG-RL, we identified a sequence of 5 residues (D232, K235, T236, H237, T238) from 1HZH  
560 PDB as the linker and generated 100 random realizations of its structure by sampling the backbone  
561 dihedral angles according to the Ramachandran distributions of disordered peptides, using rejection  
562 sampling to eliminate structures with steric clashes. For each atomic model, the `molmap` command in  
563 ChimeraX [43] was used to generate the corresponding density volume at a resolution of 3 Å with a  
564 bounding box of dimension  $D = 256$  pixels and a pixel size of 1.5 Å. Poses in Eq. 1 were uniformly  
565 sampled from  $R \in SO(3)$  and  $t$  was sampled uniformly from  $[20, 20]^2$  pixels. For the CTF, the  
566 accelerating voltage was set at 300 kV, spherical aberration at 2.7 mm, and amplitude contrast at 0.1.  
567 Defocus parameters were sampled from EMPIAR-11247 [44]. Noise was added at a signal-to-noise  
568 (SNR) ratio of 0.01. We simulate 1,000 images for each conformation to produce a dataset of 100k  
569 images. The dataset is then downsampled to  $D = 128$  by Fourier cropping.

### 570 B.3 Generating Ribosembly

571 For Ribosembly, as explained in the section 3, we used the bacterial ribosome assembly states  
572 that describes 16 different atomic models. We first centered all atomic models using the `move` in  
573 ChimeraX. Subsequently, the models were aligned to the last state (PDB: 8C8X) using `matchmaker`  
574 in ChimeraX. For each atomic model, the `molmap` command in ChimeraX [43] was used to generate  
575 the corresponding density volume at a resolution of 3 Å with a bounding box of dimension  $D = 256$   
576 pixels and a pixel size of 1.5 Å. Poses in Eq. 1 were uniformly sampled from  $R \in SO(3)$  and  $t$  was  
577 sampled uniformly from  $[20, 20]^2$  pixels. For the CTF, the accelerating voltage was set at 300 kV,  
578 spherical aberration at 2.7 mm, and amplitude contrast at 0.1. Defocus parameters were sampled from  
579 EMPIAR-10076 [45]. Noise was added at a signal-to-noise (SNR) ratio of 0.01. We simulate 1,000  
580 images for each conformation to produce a dataset of 16k images. The dataset is then downsampled  
581 to  $D = 128$  by Fourier cropping.

582 PDB: 8C9C, 8C9B, 8C9A, 8C99, 8C98, 8C97, 8C96, 8C95, 8C94, 8C93, 8C92, 8C91, 8C90, 8C8Z,  
583 8C8Y, 8C8X

### 584 B.4 Generating Tomotwin-100

585 We created Tomotwin-100 from different types of proteins as explained in the section 3. We centered  
586 all atomic models using the `move` in ChimeraX. Then, the `molmap` command in ChimeraX [43] was  
587 used to generate the corresponding volume map. For each atomic model, the `molmap` command in  
588 ChimeraX [43] was used to generate the corresponding density volume at a resolution of 3 Å with a  
589 bounding box of dimension  $D = 384$  pixels and a pixel size of 1.5 Å. Poses in Eq. 1 were uniformly



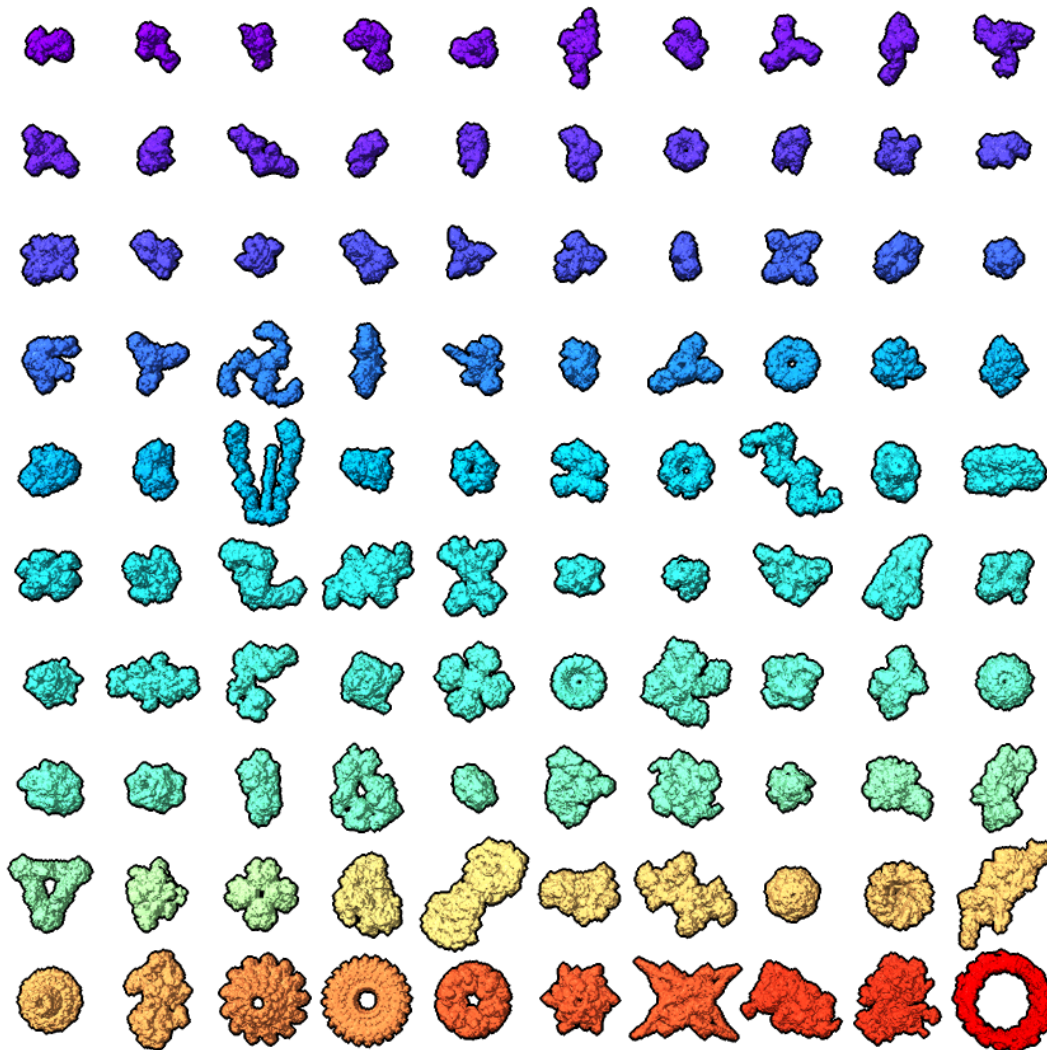

Figure 8: **Tomotwin-100**. All 100 G.Ts of Tomotwin-100 dataset.

590 sampled from  $R \in SO(3)$  and  $t$  was sampled uniformly from  $[20, 20]^2$  pixels. For the CTF, the  
 591 accelerating voltage was set at 300 kV, spherical aberration at 2.7 mm, and amplitude contrast at 0.1.  
 592 Defocus parameters were sampled from EMPIAR-11247 [44]. Noise was added at a signal-to-noise  
 593 (SNR) ratio of 0.01. Figure 8 illustrates all 100 ground truth volumes.

594 PDB: 2CG9, 6VGR, 5A20, 1UL1, 5LJO, 5CSA, 7WBT, 7SGM, 7BLR, 6ZQJ, 7NIU, 1U6G, 3ULV,  
 595 5JH9, 3D2F, 3CF3, 6LMT, 2RHS, 1BXN, 1N9G, 5H0S, 6CES, 7K5X, 7JSN, 6VN1, 1QVR, 2WW2,  
 596 6U8Q, 6KRK, 6Z80, 6LXK, 6WZT, 3MKQ, 6KSP, 2XNX, 7B7U, 6CNJ, 1SS8, 6X5Z, 7KJ2, 6KLH,  
 597 6PIF, 2DFS, 6AHU, 6F8L, 2VZ9, 7NHS, 6TGC, 6M04, 4XK8, 7E1Y, 7R04, 6I0D, 6BQ1, 7LSY,  
 598 7DD9, 3LUE, 7SFW, 7NYZ, 5O32, 6YT5, 6SCJ, 7EGE, 5VKQ, 6VZ8, 6W6M, 7T3U, 6TAV, 7E8H,  
 599 7ETM, 7AMV, 1G3I, 6Z3A, 7EGD, 7Q21, 6XF8, 6EMK, 6TA5, 6TPS, 7QJ0, 7KDV, 7EGQ, 6LXV,  
 600 6GYM, 7O01, 5G04, 7BKC, 6MRC, 6JY0, 7WOO, 7EEP, 7MEI, 6GY6, 6DUZ, 7VTQ, 7EY7,  
 601 6Z6O, 4CR2, 6ID1, 6UP6

## 602 B.5 Generating Spike-MD

603 We sourced the individual MD structures from the enhanced sampling molecular dynamics simulations  
 604 performed in ref. [37]. Using the free-energy landscape calculated with these simulations for the

605 wild-type Spike, we sampled molecular structures assuming a Boltzmann distribution with  $T = 6000$   
606 K. By using an artificially high temperature, we were able to increase the number of sampled  
607 conformations—particularly in regions with a high free energy. This process resulted in 46,789  
608 unique conformations. For each atomic model, the `molmap` command in ChimeraX [43] was used to  
609 generate the corresponding density volume at a resolution of  $3 \text{ \AA}$  with a bounding box of dimension  
610  $D = 256$  pixels and a pixel size of  $1.5 \text{ \AA}$ . Poses in Eq. 1 were uniformly sampled from  $R \in SO(3)$   
611 and  $t$  was sampled uniformly from  $[20, 20]^2$  pixels. For the CTF, the accelerating voltage was set  
612 at 300 kV, spherical aberration at 2.7 mm, and amplitude contrast at 0.1. Defocus parameters were  
613 sampled from Walls et al. [46]. Noise was added at a signal-to-noise (SNR) ratio of 0.1. We simulated  
614 100,000 images in total, 1 image per sampled conformation, resulting in approximately two images  
615 for each unique conformation.

## 616 **B.6 Signal to Noise Ratio (SNR)**

617 We define SNR as the ratio between the variance of the signal and the variance of the noise follow-  
618 ing [47]. We calculated the standard deviation of the signal ( $\sigma_{\text{signal}}$ ) over all CTF-applied projection  
619 images. We then computed  $\sigma_{\text{noise}} = \sigma_{\text{signal}} / \sqrt{\text{SNR}}$ . Finally, we added noise to each particle, drawn  
620 from a Gaussian distribution with a mean of 0 and a standard deviation of  $\sigma_{\text{noise}}$ .

621 Additionally, we illustrate cryo-EM images for all datasets in Figure 9.

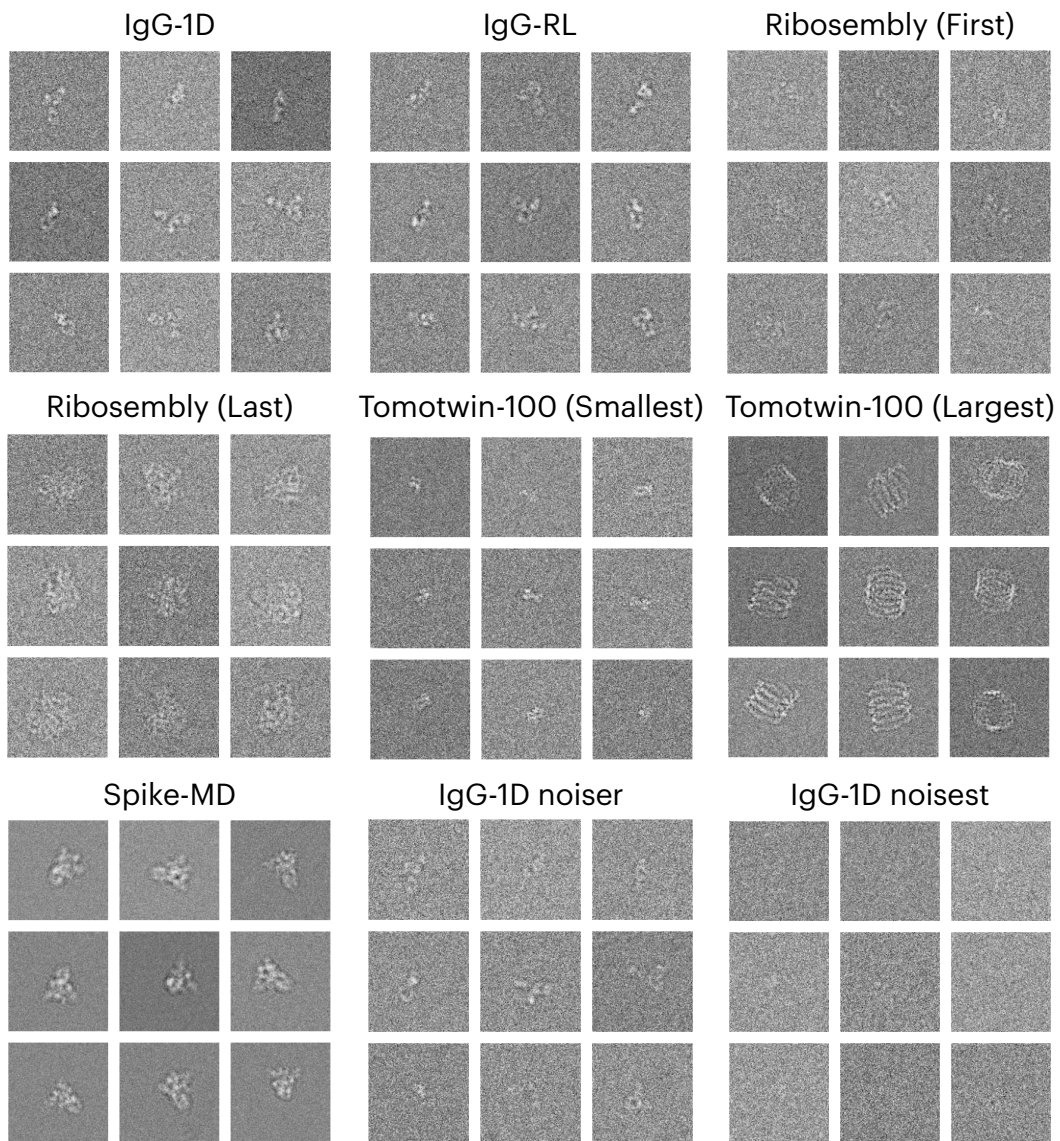

Figure 9: **Cryo-EM images for all datasets.** The first structures are shown for IgG-1D and IgG-RL, the first and last structures are shown for Ribosembly and Tomotwin-100, and a mix of structures is shown for Spike-MD.

## 622 C Experimental Settings

### 623 C.1 CryoDRGN, CryoDRGN2

624 CryoDRGN [5] is a deep generative network-based method where the input images are encoded in  
625 the (conformational) latent space and the latent coordinates are decoded into 3D volumes in Fourier  
626 domain via an implicit neural representation [4]. In its second version CryoDRGN2 [41], better *ab*  
627 *initio* capabilities were improved with changes to the hierarchical pose search (HPS) algorithm for  
628 image pose inference. In our benchmark, we use CryoDRGN for *fixed*, and CryoDRGN2 for *ab initio*  
629 purposes.

630 We trained CryoDRGN and CryoDRGN2 using the official PyTorch implementation<sup>1</sup>, version 3.0.0b.  
631 We used the default settings with the z-dimension set to 8. For the total number of training epochs,  
632 20 and 30 were used, respectively. We used one V100 GPU for training.

### 633 C.2 DRGN-AI, DRGN-AI-fixed

634 DRGN-AI [40] is a deep generative network-based method, inspired by CryoDRGN. DRGN-AI uses  
635 both HPS and stochastic gradient descent in pose estimation, while utilizing a differential lookup  
636 table instead of an encoder network to encode the pose and conformational latent variable information.  
637 We denote the *fixed pose* mode of operation with “DRGN-AI-fixed” and *ab initio* with “DRGN-AI.”

638 We trained DRGN-AI and DRGN-AI-fixed using the official PyTorch implementation<sup>2</sup>, version  
639 0.2.2b0. We used the default settings with the z-dimension set to 4 and the total number of training  
640 epochs set to 100. We used one A100 GPU for training.

### 641 C.3 Opus-DSD

642 Opus-DSD [9] is also a deep generative network-based method, built upon CryoDRGN. The network  
643 architecture is similar to CryoDRGN except that it uses a 3D Convolutional Neural Network (CNN)  
644 and priors for the latent conformational variable.

645 We trained Opus-DSD using the official PyTorch implementation<sup>3</sup>. We used the default settings  
646 with the z-dimension set to 12, valfrac of 0.25, downfrac of 0.75, and lamb of 1.0, bfactor of  
647 4.0, and templatere0 of 192 as recommended on the official GitHub. For the Spike-MD dataset,  
648 we use a downfrac of 1.00 and templatere0 of 256. The total number of training epochs was  
649 set to 20. The volume reconstructed by Opus-DSD is smaller than the original image dimensions.  
650 Consequently, to compute the volume metric (Per-Conformation FSC), we added zero paddings to  
651 match the dimensions of the original image. We used four A100 GPUs for training.

### 652 C.4 RECOVAR

653 RECOVAR [10] is a white-box approach that utilizes principal component analysis (PCA), which is  
654 computed through regularized covariance estimation.

655 We trained RECOVAR using the official PyTorch implementation<sup>4</sup>. We used the default settings with  
656 the z-dimension set to 10 and applied the mask as an input. We used one V100 GPU for training.

### 657 C.5 CryoSPARC

658 We used the official CryoSPARC<sup>5</sup> version 4.4.0 to train 3DFlex, 3DVA, 3D Classification (fixed,  
659 *ab initio*). Some methods in CryoSPARC require a consensus volume. We created this volume for

<sup>1</sup><https://github.com/ml-struct-bio/cryodrgn>

<sup>2</sup><https://github.com/ml-struct-bio/drgnai>

<sup>3</sup><https://github.com/alncat/opusDSD>

<sup>4</sup><https://github.com/ma-gilles/recover>

<sup>5</sup><https://cryosparc.com>

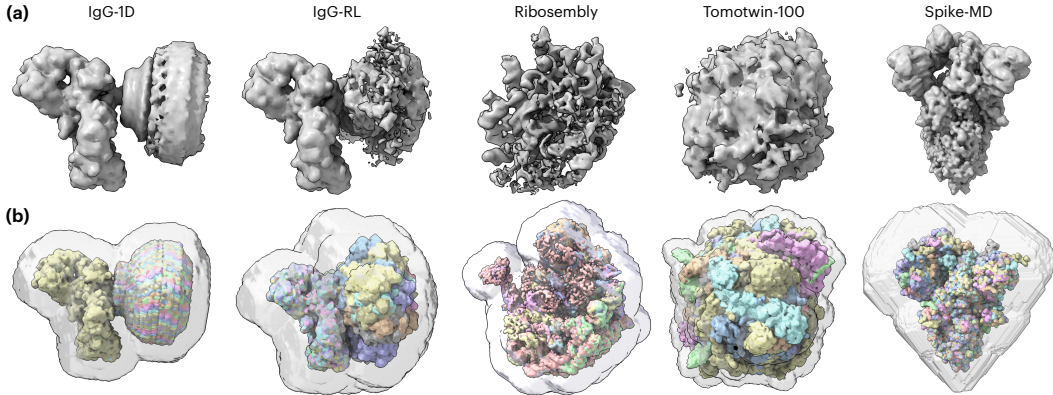

Figure 10: **Consensus volumes and Masks.** (a) Consensus volumes (Backprojection) for each dataset (b) Mask for each dataset. 10 G.T. volumes are shown within the mask for Spike-MD, and all G.T. volumes are shown for other datasets.

660 each dataset by using the backprojection [5] of all corresponding cryo-EM images. We provide the  
 661 backprojected volume (consensus volume) and masks in Figure 10.

662 **3DFlex.** 3DFlex [39] is a heterogeneous reconstruction method provided in the CryoSPARC software  
 663 suite. 3DFlex is a deep learning-based method in which a deep neural network is trained to construct  
 664 deformation flow fields as a function of the conformational latent space coordinates to construct the  
 665 heterogeneous reconstruction as a “deformation” of the single canonical 3D volume.

666 In the mesh preparation phase (*Flex Mesh Prep*), we provided the consensus volume and mask as  
 667 inputs. We adjusted the settings as follows: Mask threshold was set to 2, Mask dilation to  
 668 5, Mask soft padding to 10, Min.rigidity weight to 1. For the *3D Flex Training*, we set  
 669 the Rigidity parameter to 10 and left all other training parameters to their default settings. The  
 670 z-dimension is 2.

671 Due to its high levels of heterogeneity, Spike-MD required special treatment. First, the particle  
 672 stack was normalised such that the mean of each image was 0 and the variance was 1. A 3DFlex  
 673 model was trained with consensus poses and volume from *ab initio* reconstruction, and the following  
 674 hyperparameters. The number of latent dimensions was 3, the MLP neural network which dictates  
 675 the deformations of the 3DFlex model had 256 hidden layers, we trained the model for 32 epochs  
 676 beyond the standard training time. All other parameters were left to their default values.

677 **3DVA.** 3DVA [7] is a heterogeneous reconstruction algorithm, which is formulated as a Probabilistic  
 678 PCA approach and utilizes E-M to obtain the heterogeneous reconstructions.

679 We provided the particles and mask as inputs and set the latent dimension to 3 (default). Moreover,  
 680 the Filter resolution was set to 5 for Spike-MD, 10 for IgG-1D, IgG-RL, and Ribosembly,  
 681 and 15 for Tomotwin-100.

682

683 **3D Classification.** 3D Classification is a standard method for analyzing and filtering heterogeneous  
 684 cryo-EM datasets due to its ease of use and interpretability [48, 49, 50, 38, 51]. This approach models  
 685 heterogeneity as originating from a discrete mixture model of  $K$  independent voxel arrays, where  
 686 class assignment probabilities are jointly optimized with the molecular volumes via expectation maxi-  
 687 mization (E-M). While use of 3D classification is ubiquitous, the method requires ad hoc, user-driven  
 688 choices such as the number of classes and initialization for E-M, which leads to complex processing  
 689 pipelines and often misses conformations, especially when the simple model of heterogeneity is  
 690 mismatched with the true distribution.

691 For fixed pose classification, we used a Target resolution of 3 for Spike-MD and 9 for  
 692 Tomotwin-100. We used 20 classes for Spike-MD and 10 classes for all other datasets. All other  
 693 parameters were left at their defaults. For *ab initio* classification, the Target resolution was

694 set to 6 for Spike-MD. We used 10 classes for Tomotwin-100, 16 classes for Ribosembly, and 20  
695 classes for IgG-1D, IgG-RL, and Spike-MD. All other parameters were left at their defaults.

696 The z-dimension, for the purposes of the metric analysis, was defined as the class posterior, whose  
697 length was dataset dependent: 10 (fixed) and 20 (abinit) for IgG-1D, IgG-RL, and Ribosembly, 10  
698 (fixed and abinit) for Tomotwin-100, and 20 (fixed and abinit) for Spike-MD.

### 699 C.6 Number of Latent Dimensions.

An overview of the number of latent dimensions for each method is given in Table 3.

| Method          | Number of Latent Dimensions |
|-----------------|-----------------------------|
| CryoDRGN        | 8                           |
| DRGN-AI-fixed   | 4                           |
| Opus-DSD        | 12                          |
| 3DFlex          | 2 (3 for MD-Spike)          |
| 3DVA            | 3                           |
| RECOVAR         | 10                          |
| 3D Class        | 10                          |
| CryoDRGN2       | 8                           |
| DRGN-AI         | 4                           |
| 3D Class abinit | 20 (10 for Tomotwin-100)    |

Table 3: Number of Latent Dimensions for Different Methods

700

### 701 C.7 Ground Truth Heterogeneity Embeddings.

702 Here we define the ground truth heterogeneity embeddings used for Neighborhood Similarity and  
703 Information Imbalance. The ground truth embedding for each IgG-1D structure is a 2D vector of the  
704 sine and cosine of the rotation angle. The embedding for each IgG-RL conformation is a 3D vector of  
705 the centre of mass, and the sine and cosine of the dihedral angle. The Ribosembly embeddings are  
706 defined in two different ways: *i*) size rank of the atomic models or *ii*) 4096D vector of voxel intensity  
707 (real spaced cropped to  $156^3$  and downsampled via Fourier cropping to  $16^3 = 4096$  voxels). The  
708 Tomotwin-100 embeddings are defined as the size rank of the atomic models. The embeddings for  
709 Spike-MD are defined as CV1 and CV2 as in Ref. [37] and Figure 7.

### 710 C.8 Neighborhood Similarity.

711 The percentage of matching neighbors (pMN) (Eq. 2) was calculated using Python with JAX GPU  
712 acceleration [52] as a function of the neighborhood radius. All datasets, except for Ribosembly,  
713 were divided into five independent sets (Ribosembly was divided into three). The mean pMN and  
714 the standard deviation of its mean were computed using these independent sets. The neighborhood  
715 radius, expressed as a percentage of the total number of images, was  $k = \frac{100n}{N_s}$ , where  $N_s$  the  
716 total number of structures in the dataset and  $n = 1, \dots, N_s$ . Note that the pMN for  $n = 1$  (i.e.,  
717  $k = \frac{100}{N_s} [\%]$ ) evaluates how well the embeddings cluster images originating from each structure,  
718 effectively measuring structural clustering. In contrast, the pMN for  $n > 1$  provides insights into how  
719 the connections between ground truth structures relate to the embeddings generated by each method,  
720 revealing how images from different structures are interconnected.

### 721 C.9 Information Imbalance.

722 Information imbalance was computed via the implementation in DADapy [53], using a `maxk` (maxi-  
723 mum number of neighbours to be considered for the calculation of distances) of the total number  
724 of points (16,000 for Ribosembly and 100,000 for the other datasets), and a `subset_size` of 2,000.  
725 Error was defined by computing the standard deviation of information imbalances computed with

726 different neighbourhood sizes, and here we used  $k = 1, 3, 10, 30$  (0.05, 0.015, 0.5, 1.5%) of neigh-  
 727 bourhood size. Significantly larger neighbourhood sizes approached the orthogonal (1,1) region.  
 728 Error bars are visible in Tomotwin-100 (Fig. 6d), but smaller than marker size for other datasets.

729 Small amounts of smearing were applied to average over the 1000-fold duplication of the ground  
 730 truth heterogeneity latent in the image. Additive noise from a uniform distribution,  $u \sim U[-\epsilon, \epsilon]$  was  
 731 added according to Table 4.

732 The ground truth pose embedding is a 9 dimensional flattened vector of the rotation matrix (translation  
 733 neglected). The ground truth CTF embedding is a 4 dimensional vector of the two defoci, and the  
 734 sine and cosine of the angle of astigmatism, normalized by subtracting off the mean and dividing by  
 735 the standard deviation.

| <b>Dataset</b> | <b>Collective Variable</b>                                                         | $\epsilon$ |
|----------------|------------------------------------------------------------------------------------|------------|
| IgG-1D         | angle in degrees (before sine / cosine transform)                                  | 0.05       |
| IgG-RL         | center of mass ( $\text{\AA}$ ), angle in degrees (before sine / cosine transform) | 0.1        |
| Ribosembly     | voxel intensity                                                                    | 0.1        |
| Tomotwin-100   | rank size                                                                          | 0.1        |
| MD             | CV1 and CV2                                                                        | 0.1        |

Table 4: Smearing ground truth heterogeneity latent embeddings.

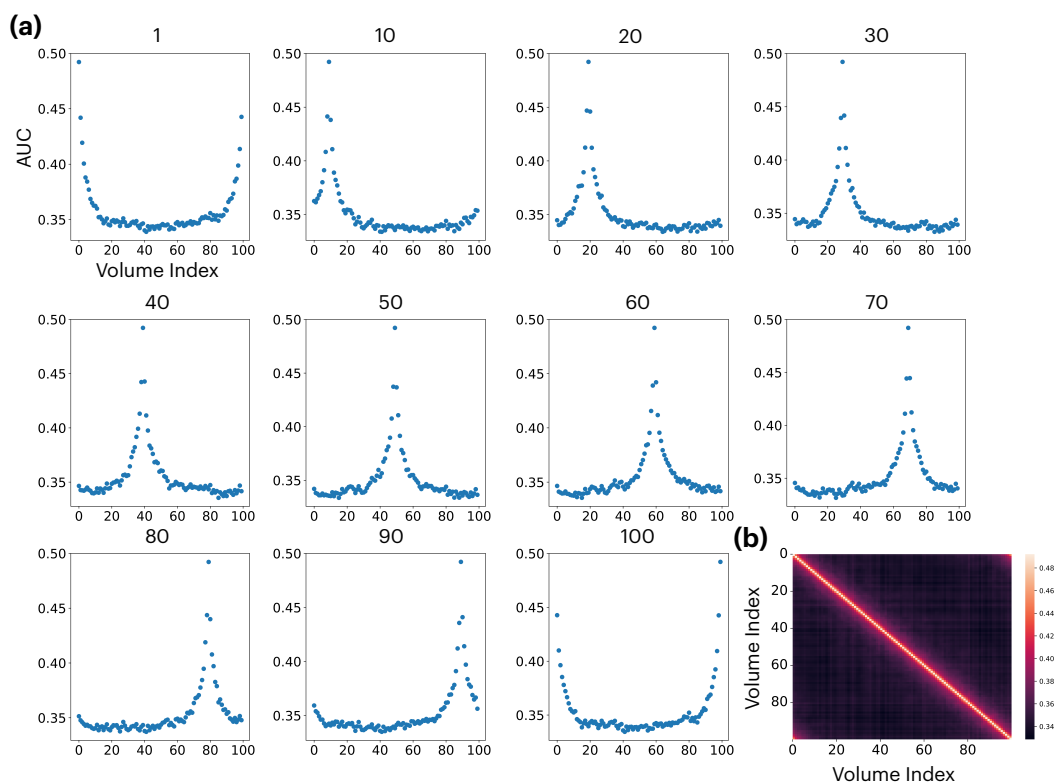

Figure 11: **Metric verification.** (a) AUC-FSC between one G.T and all 100 G.Ts of the IgG-1D dataset. Each plot corresponds to the reference G.T volume, indicated by the number above the plot. (b) Heatmap comparing all 100 G.Ts against all 100 G.Ts.

## 736 D Supplementary Results

### 737 D.1 Metric verification

738 **UMAP visualization.** In Section 5, we provide UMAP plots computed using the official framework<sup>6</sup>,  
 739 applying the default parameters.

740 **AUC-FSC.** Figure 11(a) illustrates the AUC-FSC for the ground truth volumes of the IgG-1D dataset.  
 741 The AUC reaches its highest point at one specific index, indicating the value is sensitive to structural  
 742 differences. Given that the IgG-1D dataset includes 1D circular motion, the volume indices 1 and  
 743 100 show two peak points. Figure 11(b) demonstrates that the heatmap displays the highest values  
 744 when AUC values are compared between identical volumes.

### 745 D.2 Mask vs No Mask

746 We utilize a mask when computing the FSC metrics reported elsewhere in the text. Here, we provide  
 747 an analysis comparing the use of a mask versus no mask with Per-Conformation FSC (Fig. 12). For  
 748 mask generation, we first aggregated all ground truth volumes using the `volume add` in ChimeraX.  
 749 Subsequently, we then applied the `Volume Tools` in CryoSPARC. Specifically, for IgG-1D, IgG-RL,  
 750 and Ribosome, the `Dilation radius (pix)` and `Soft padding width (pix)` were set at 8  
 751 and 5, respectively. For Tomotwin-100, these parameters were adjusted to a `Dilation radius`  
 752 (`pix`) of 5 and a `Soft padding width (pix)` of 3. For Spike-MD, we take the union of all  
 753 binarized volumes and use the `cryoDRGN gen_mask` command with a dilation of 25 Å and soft

<sup>6</sup><https://umap-learn.readthedocs.io/en/latest/api.html>



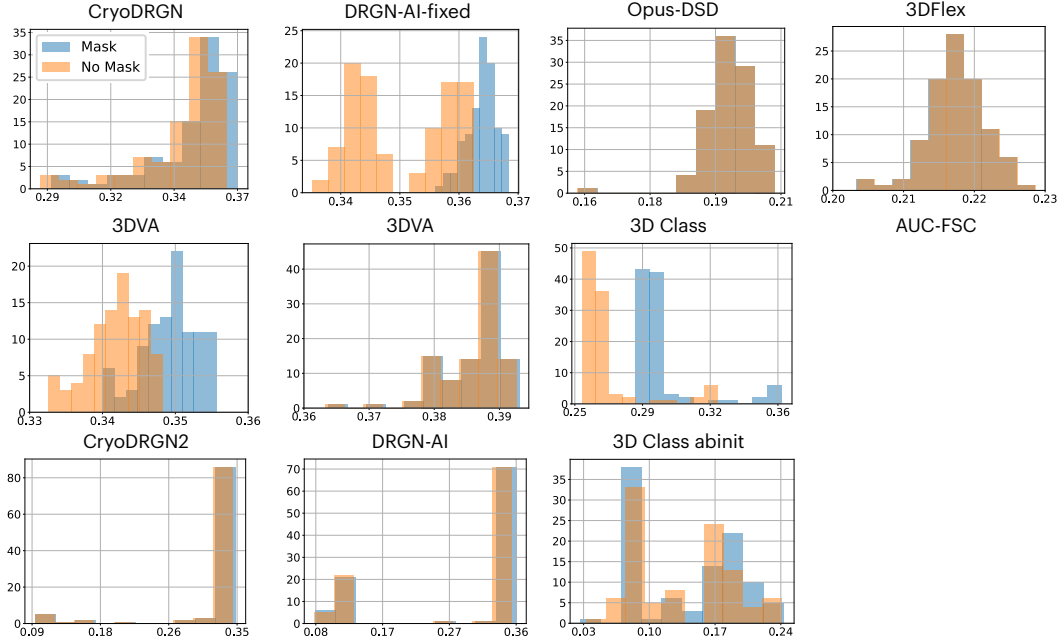

Figure 12: **Mask comparison with IgG-1D.** Histogram comparing Per-Conformation FSC for each method, with and without a mask.

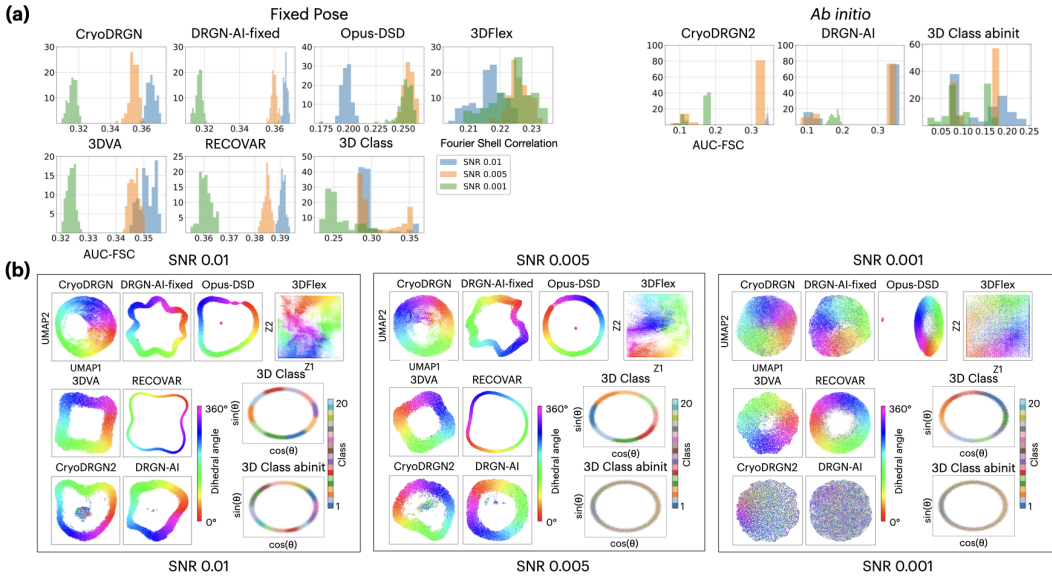

Figure 13: **IgG-1D with noise.** (a) Histogram of Per-Conformation FSC for each method at SNR levels of 0.01, 0.005, 0.001. (b) UMAP visualizations colored by G.T. dihedral conformations of each method.

754 cosine edge of 15 Å. Masking out background noise generally enhances performance when computing  
 755 volume metrics.

### 756 D.3 Noise Comparison

757 As shown in Figure 13, we applied higher noise settings (SNR 0.005, 0.001) to the IgG-1D dataset.  
 758 With increasing noise levels, there is a noticeable reduction in volume metrics, and the capability to  
 759 differentiate between different conformations decreases.

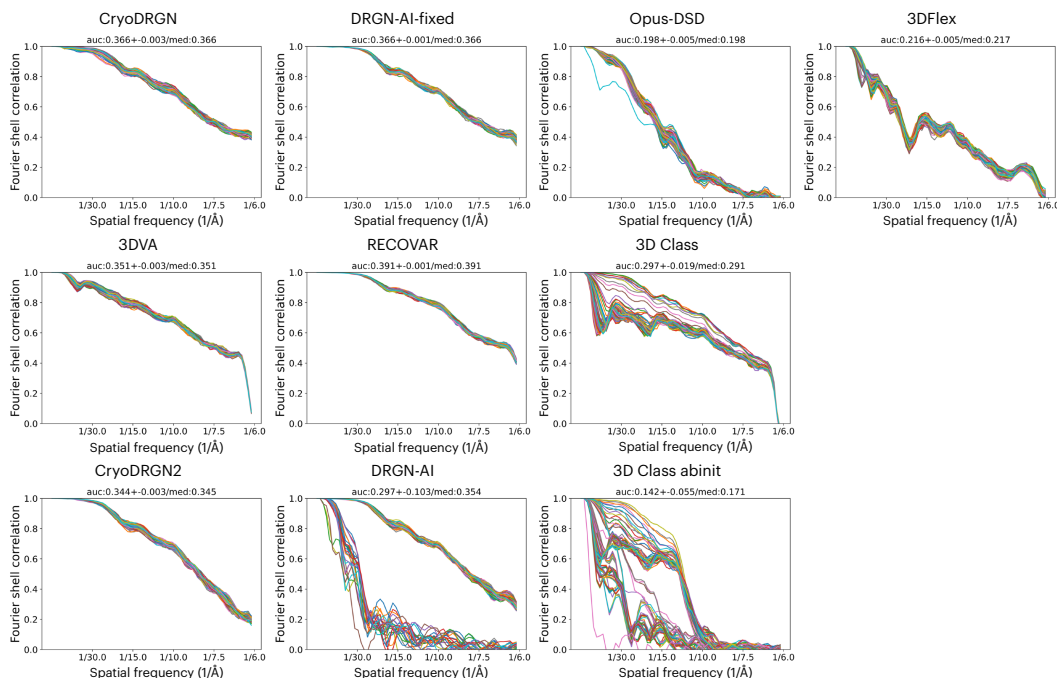

Figure 14: **Per-Conformation FSC per particle.** All 100 FSCs for the IgG-1D dataset at an SNR level of 0.01. Masks were applied to compute the FSCs.

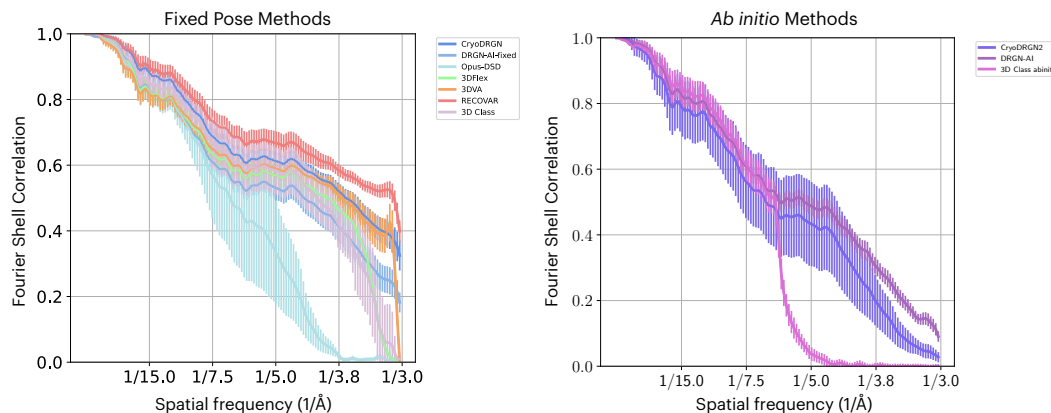

Figure 15: **Per-Conformation FSC for Spike-MD.**

#### 760 D.4 Per-Conformation FSC

761 We presented the average values and error bars for Per-Conformation FSC across all datasets for each  
 762 method in the Figure 2, 3, 4, 6, 7. In this section, we illustrate all 100 FSC plots for the IgG-1D  
 763 dataset for all methods in Figure 14. Additionally, we present FSC curves for the Spike-MD dataset  
 764 in Figure 15.

#### 765 D.5 Volume FSC

766 We illustrate the *Volume FSC* plots for each method across all datasets in Figure 16. Given a recon-  
 767 structed volume, the AUC of the FSC at varying resolutions is computed between the reconstructed  
 768 volume and all original volumes. The maximum AUC is taken to be its *Volume FSC*. The metric can

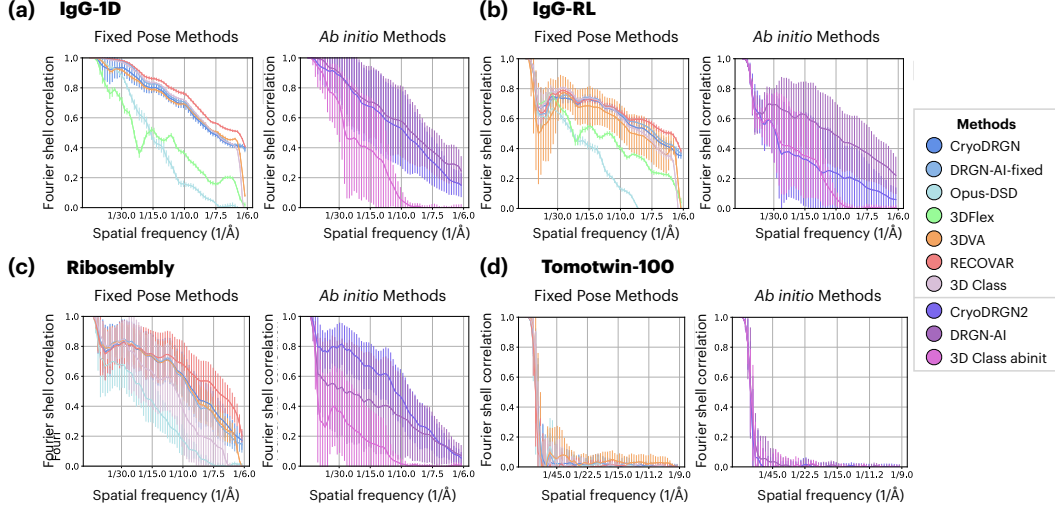

Figure 16: Volume FSC.

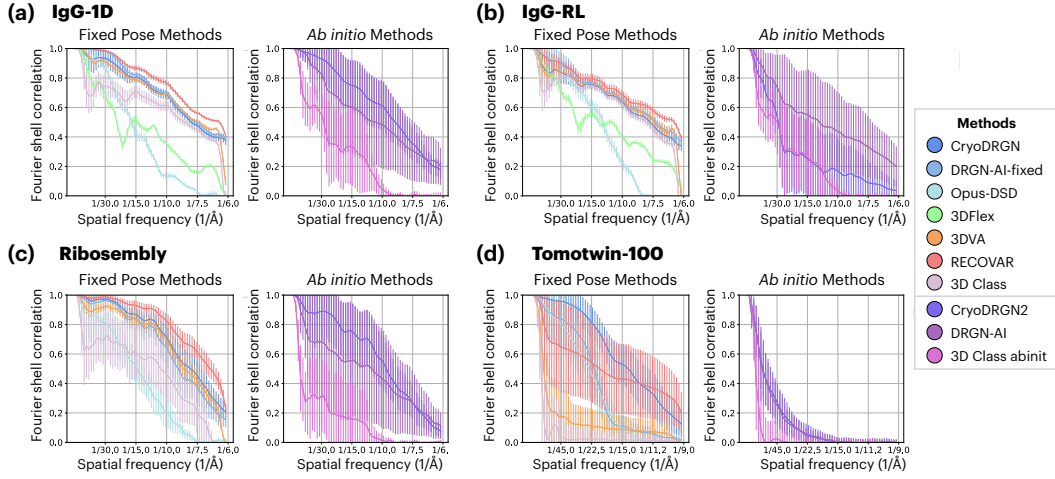

Figure 17: Per-image FSC.

769 be written as:

$$Volume-FSC(U) = \max_g \text{AUC}_t(x, FSC_t(U, V^{(g)})) \quad (4)$$

$$FSC_t(U, V^{(g)}) = \left( \frac{\sum_{s \in S_t} U_s V_s^{(g)}}{\sqrt{\sum_{s \in S_t} |U_s|^2 \sum_{s \in S_t} |V_s^{(g)}|^2}} \right) \quad (5)$$

770 where  $U$  is the Fourier transform of the reconstructed volume,  $V^{(g)}$  is the Fourier transform of the  
 771  $g$ 'th ground truth volume,  $S_t$  represents the set of Fourier voxels in a spherical shell at a distance  $t$   
 772 from the origin, and  $x$  denotes the resolution. In practice, we choose cluster centroid volumes of each  
 773 method as representative reconstructions for evaluation.

## 774 D.6 Per-image FSC

775 We propose *Per-image FSC* as a metric for jointly assessing reconstruction quality and image  
 776 conformation estimation. Here, for each of 100 images uniformly chosen from the datasets, we  
 777 reconstruct an associated volume and assess its FSC AUC to the image's ground truth volume. Thus,

778 unlike with *Volume FSC*, methods must produce a high quality reconstruction that is also consistent  
779 with the conformation in a given image. For 3DVA, we aggregate the consensus density map with  
780 all three eigen-volumes according to the latent coordinates of each image. For 3D Class, the class  
781 volume assigned to a given image is used as its reconstruction. Figure 17 provide Per-image FSC  
782 plots for each method across all datasets.

### 783 **D.7 Qualitative Evaluation**

784 For the qualitative evaluation, we provide additional visualization results for the reconstructed  
785 volumes and UMAPs. Figure 18, 19, 20, 21, 22, 23, and 24 display K-means centers and UMAP,  
786 with dots corresponding to each center.

### 787 **D.8 Information Imbalance**

788 **CTF and Pose:** Information imbalance with respect to the ground truth latent pose (rotation only,  
789 not translation) and CTF parameters is generally in the orthogonal region (1,1) for all methods (Figs.  
790 25,26). However, zooming in, for pose, CryoDRGN and Opus-DSD are off the shared information  
791  $x=y$  line, indicating their minor entanglement is more pronounced than other methods. For CTF the  
792 trends are less clear, but Opus-DSD and 3D Class abinit are generally the furthest away from the  
793 orthogonal region.

### 794 **D.9 Spike-MD embedding metrics**

795 The percentage of matching neighbors was calculated as a function of the neighborhood radius for  
796 the Spike-MD dataset (Figure 27-left). Consistent with UMAP visualizations, we observe a relatively  
797 low similarity in neighborhoods between the embeddings and the ground truth molecular dynamics  
798 collective variables for small neighborhood radii.

799 Information imbalance of the Spike-MD dataset (Figure 27-right) shows 3DVA on the shared infor-  
800 mation line at (0.5,0.5) - a very similar result as in IgG-1D. Opus-DSD and CryoDRGN2 are near  
801 (0.9,0.6), the closest to the orthogonal region for the Spike-MD dataset compared with other methods.  
802 For Opus-DSD, this is the closest to the orthogonal region compared with its information imbalance  
803 on the other datasets. For CryoDRGN2, this is a similar value as the challenging datasets (IgG-RL and  
804 Tomotwin-100). The other methods employed in these experiments (CryoDRGN, DRGN-AI-fixed,  
805 3DFlex, RECOVAR, DRGN-AI) are closer to the equivalent zone and cluster together near (0.5,0.2).

### 806 **D.10 K-Means Clustering Accuracy**

807 To additionally assess the ability of methods to classify particles arising from discrete structures, for  
808 Ribosembly and Tomotwin-100, we  $k$ -means cluster the latents for each method, with  $k$  set to the  
809 number of ground truth structures in the dataset, and compare the cluster assignments to the true  
810 structural labels. We employ two common metrics for clustering consistency, the Adjusted Rand Index  
811 (ARI) and Adjust Mutual Information (AMI). As shown in Table 5, results are generally consistent  
812 with the clustering accuracy shown in Table 2, with RECOVAR and CryoDRGN performing the best  
813 on Ribosembly and Tomotwin-100, respectively.

| Method        | Ribosembly   |              | Tomotwin-100 |              |
|---------------|--------------|--------------|--------------|--------------|
|               | ARI          | AMI          | ARI          | AMI          |
| CryoDRGN      | 0.789        | 0.886        | <b>0.956</b> | <b>0.983</b> |
| DrgnAI-fixed  | 0.718        | 0.854        | 0.791        | 0.906        |
| Opus-DSD      | 0.707        | 0.812        | 0.500        | 0.781        |
| 3DVA          | 0.726        | 0.860        | 0.058        | 0.335        |
| RECOVAR       | <b>0.807</b> | <b>0.908</b> | 0.315        | 0.649        |
| CryoDRGN2     | 0.549        | 0.698        | <b>0.116</b> | <b>0.374</b> |
| DrgnAI-abinit | <b>0.630</b> | <b>0.800</b> | 0.086        | 0.275        |

Table 5: **K-Means Clustering Accuracy.** Adjusted Rand Index (ARI) and Adjusted Mutual Information (AMI) between true structural labels and predicted labels for each particle. Predicted labels are obtained by running  $k$ -means clustering on the particle latents, with  $k$  set to the number of ground truth structures. These findings align with those previously reported for neighborhood similarity, as shown in Table 2.

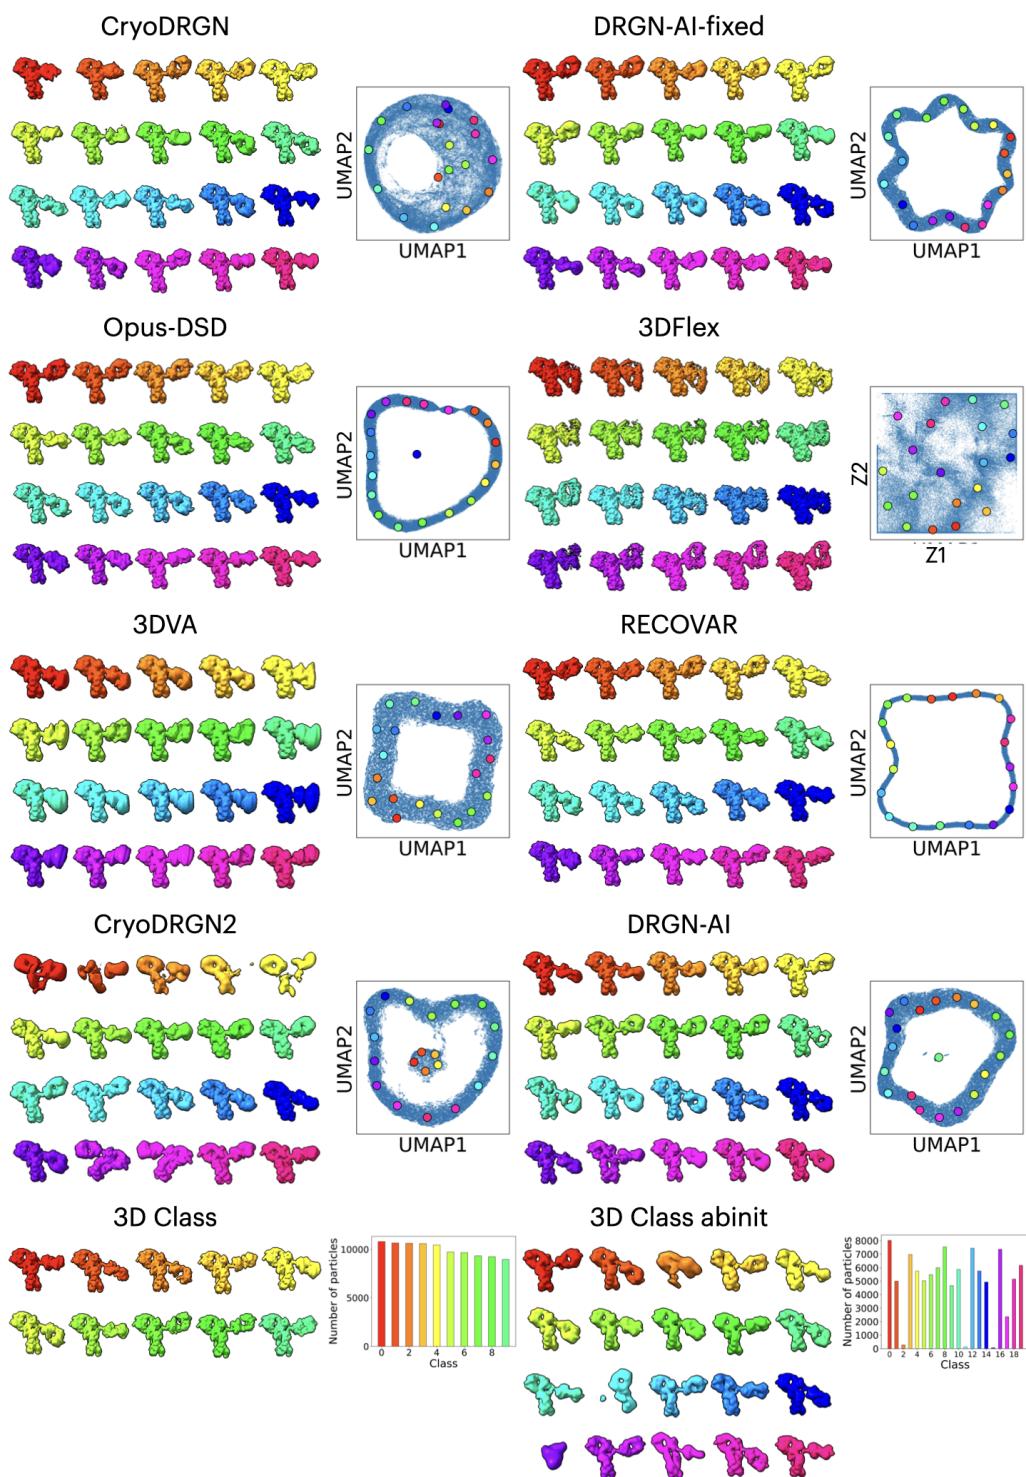

Figure 18: **Qualitative Results (IgG-1D)**. For each method, representative volumes and a UMAP plot of the latent space are shown. Volumes correspond to K-Means cluster centers with  $K=20$ . Cluster centers are marked on the UMAP plot with a dot of the corresponding color. Class volumes and particle counts are shown for 3D Classification.



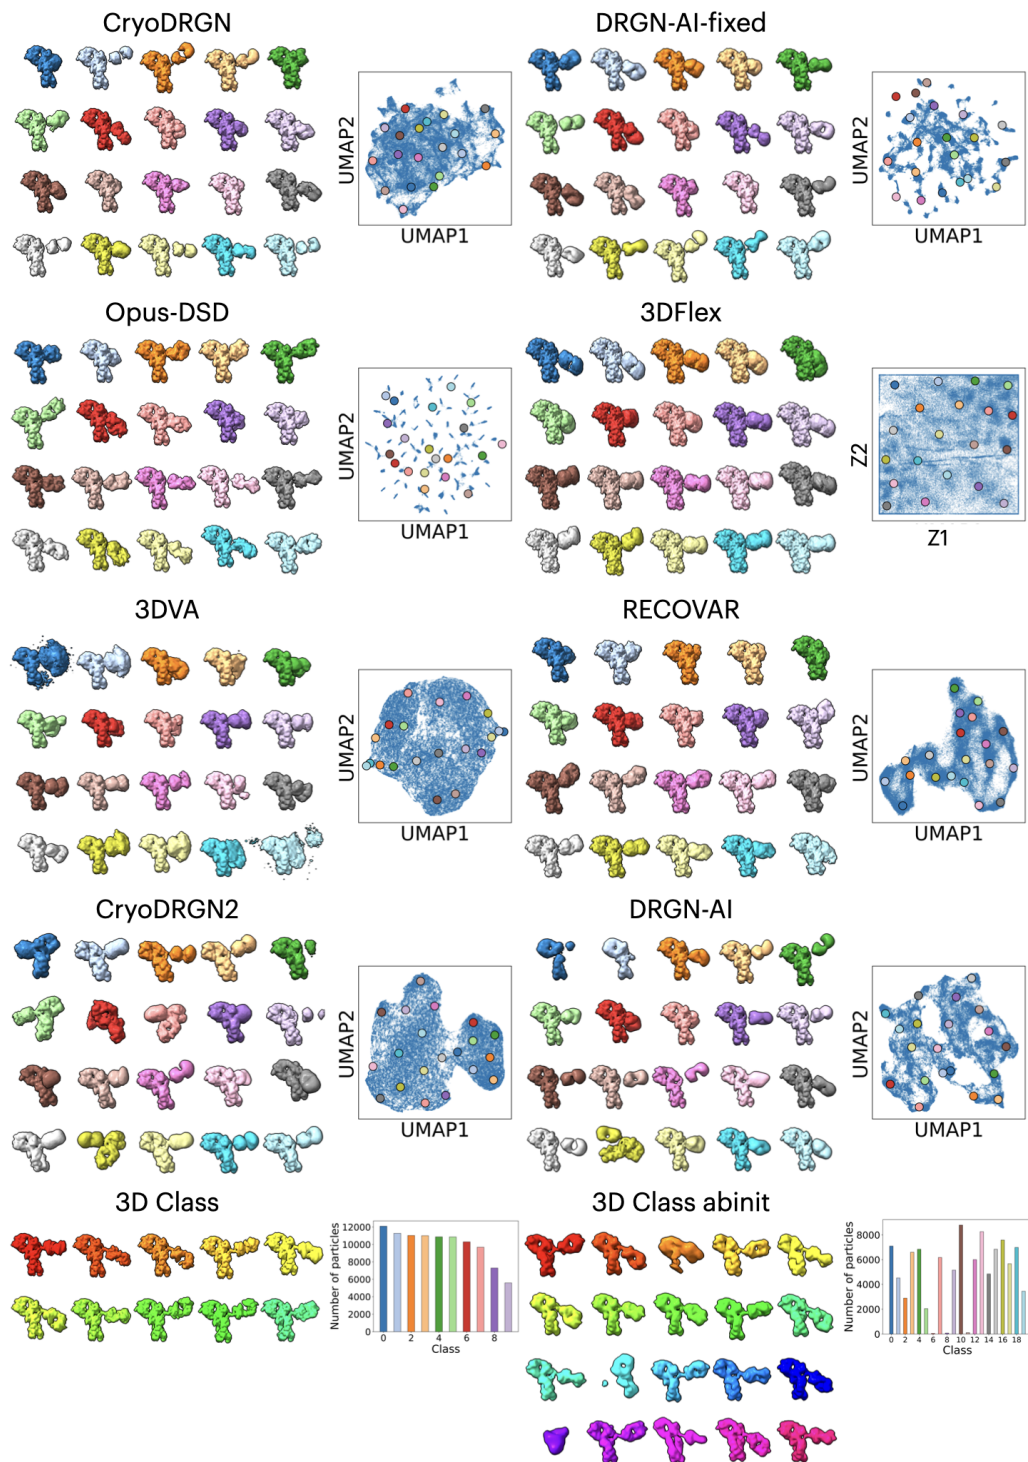

Figure 19: **Qualitative Results (IgG-RL)**. For each method, representative volumes and a UMAP plot of the latent space are shown. Volumes correspond to K-Means cluster centers with  $K=20$ . Cluster centers are marked on the UMAP plot with a dot of the corresponding color. Class volumes and particle counts are shown for 3D Classification.

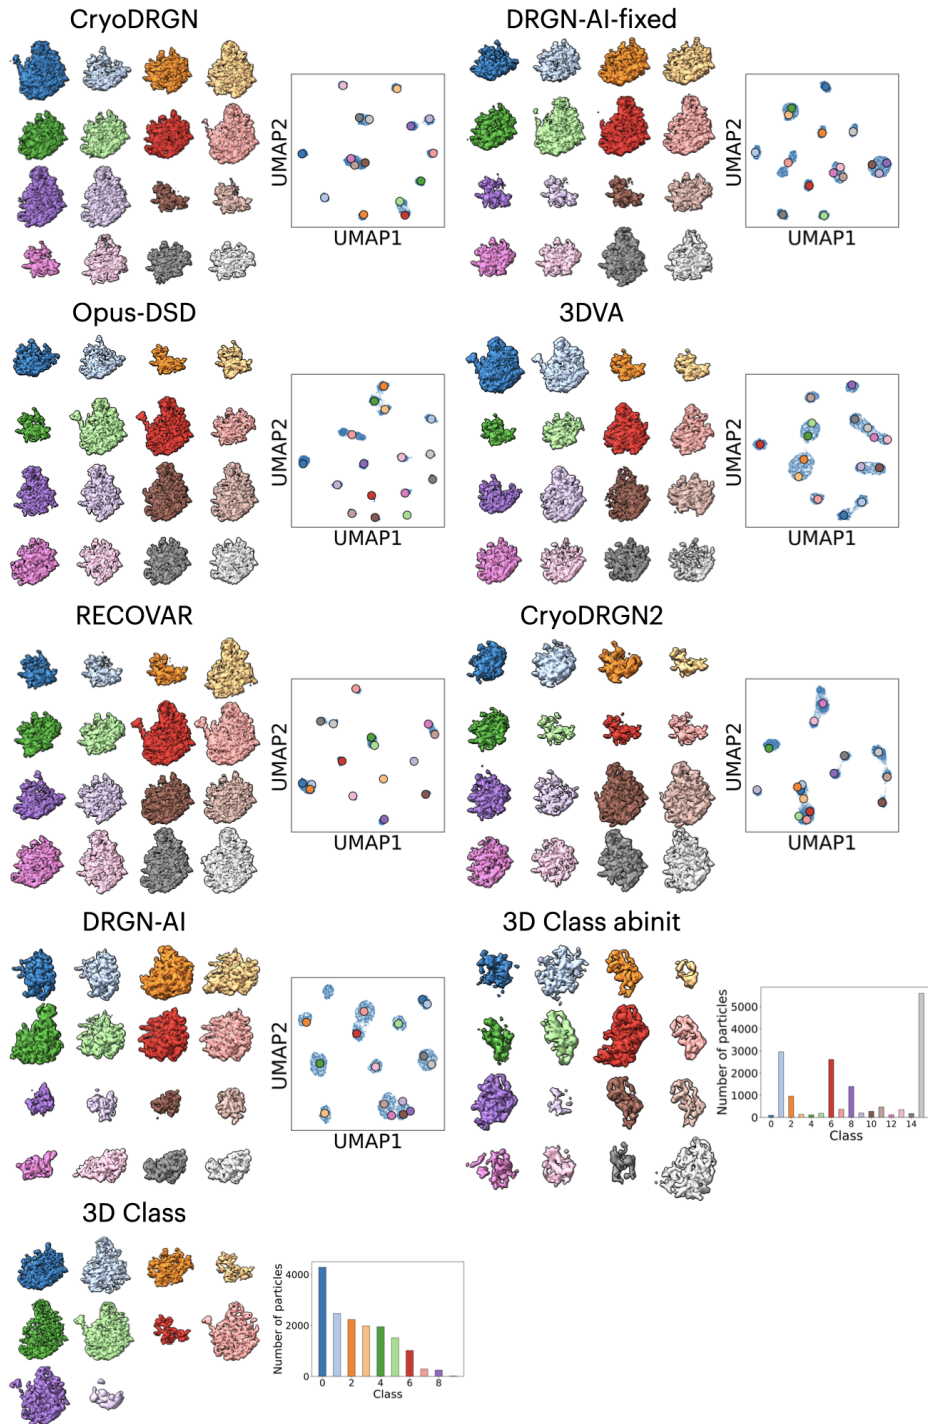

Figure 20: **Qualitative Results (Ribosembly)**. For each method, representative volumes and a UMAP plot of the latent space are shown. Volumes correspond to K-Means cluster centers with  $K=20$ . Cluster centers are marked on the UMAP plot with a dot of the corresponding color. Class volumes and particle counts are shown for 3D Classification.



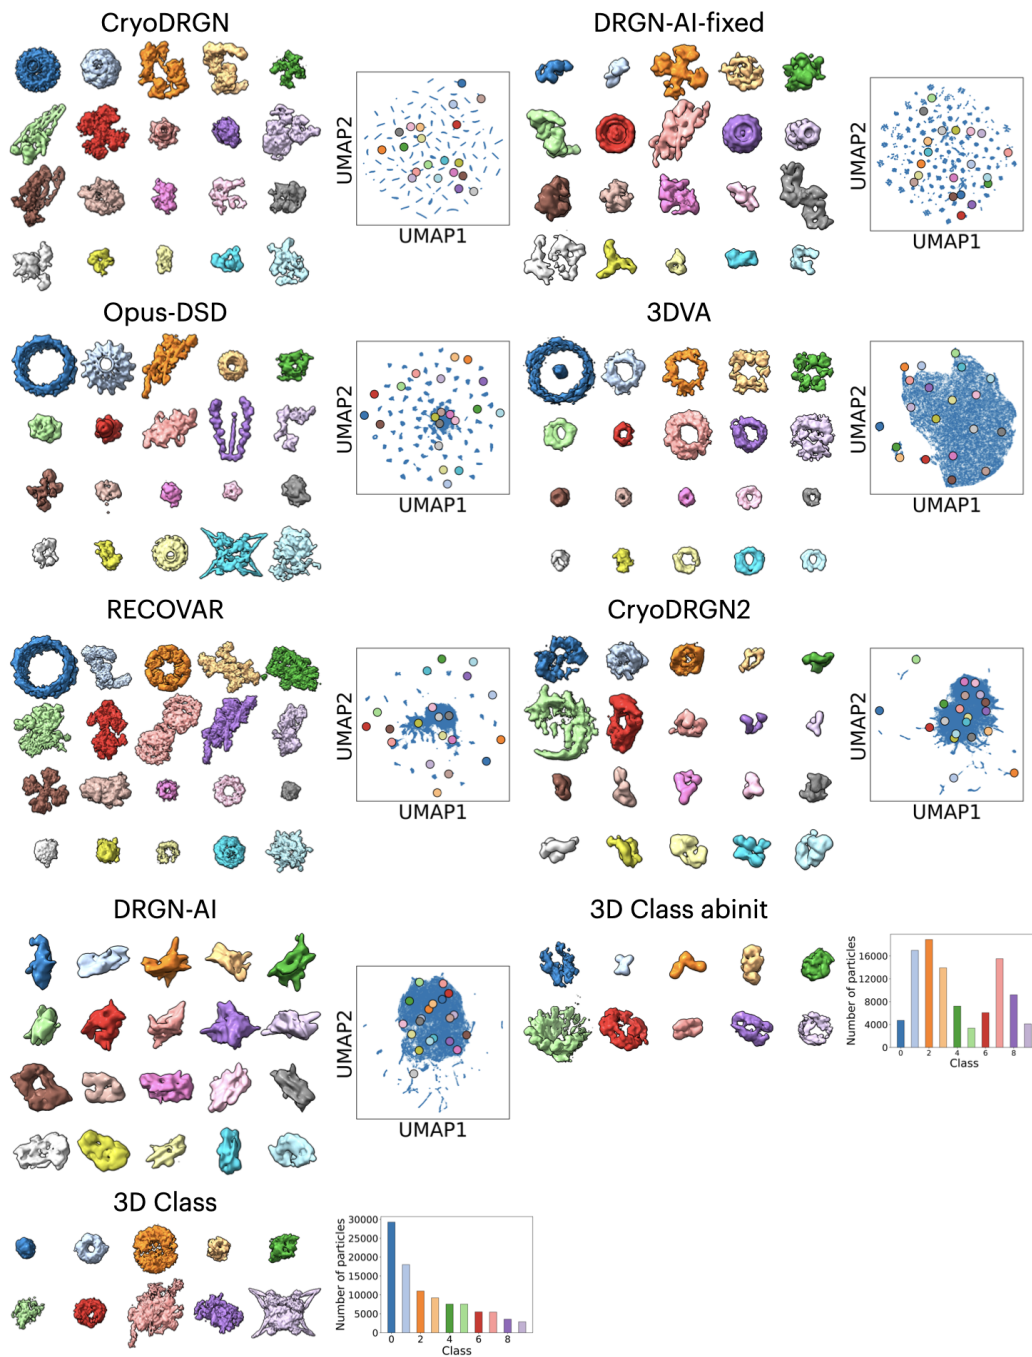

Figure 21: **Qualitative Results (Tomotwin-100)**. For each method, representative volumes and a UMAP plot of the latent space are shown. Volumes correspond to K-Means cluster centers with  $K=20$ . Cluster centers are marked on the UMAP plot with a dot of the corresponding color. Class volumes and particle counts are shown for 3D Classification.

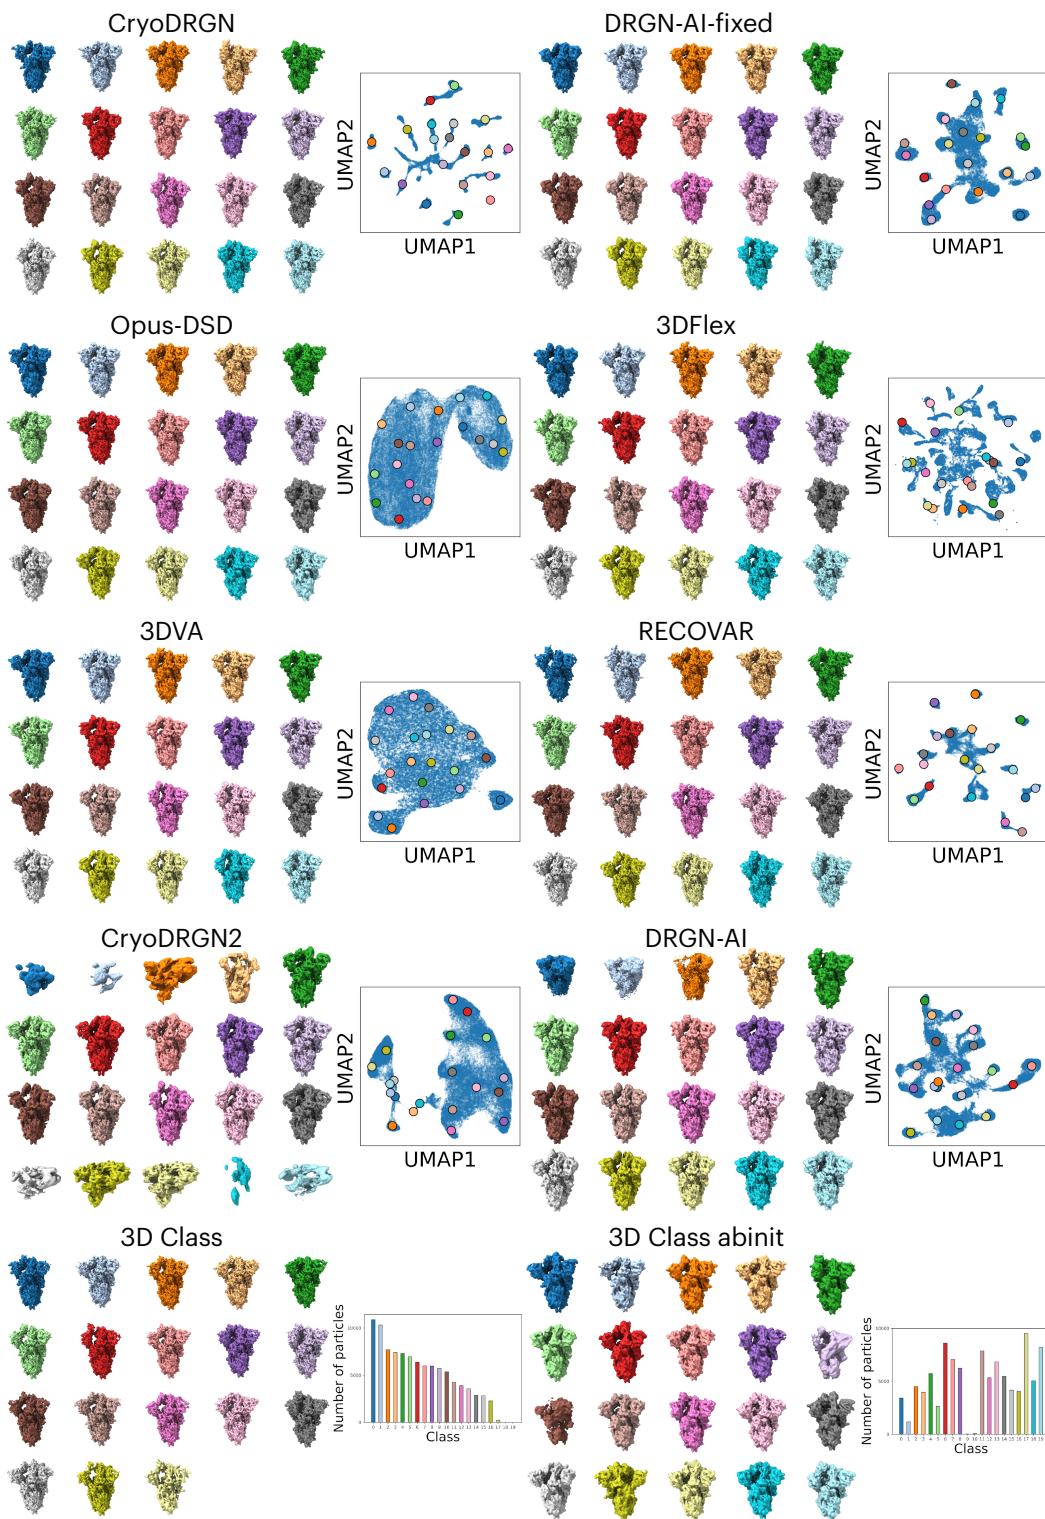

Figure 22: **Qualitative Results (Spike-MD)**. For each method, representative volumes and a UMAP plot of the latent space are shown. Volumes correspond to K-Means cluster centers with  $K=20$ . Cluster centers are marked on the UMAP plot with a dot of the corresponding color. Class volumes and particle counts are shown for 3D Classification.

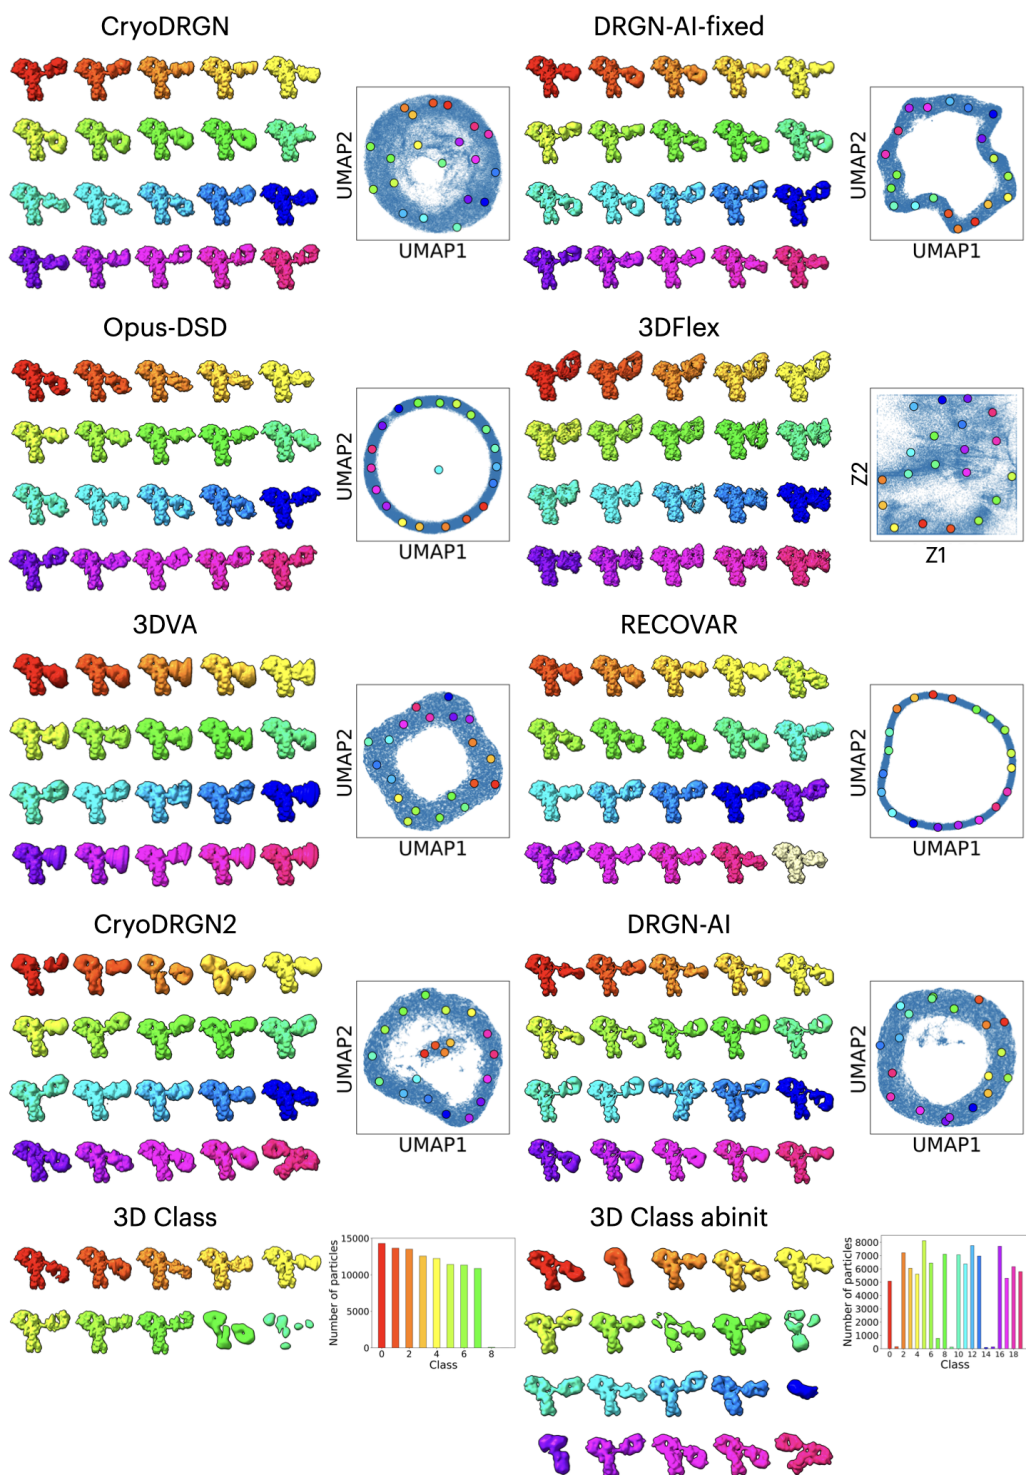

Figure 23: **Qualitative Results (IgG-1D noisier)**. For each method, representative volumes and a UMAP plot of the latent space are shown. Volumes correspond to K-Means cluster centers with K=20. Cluster centers are marked on the UMAP plot with a dot of the corresponding color. Class volumes and particle counts are shown for 3D Classification.



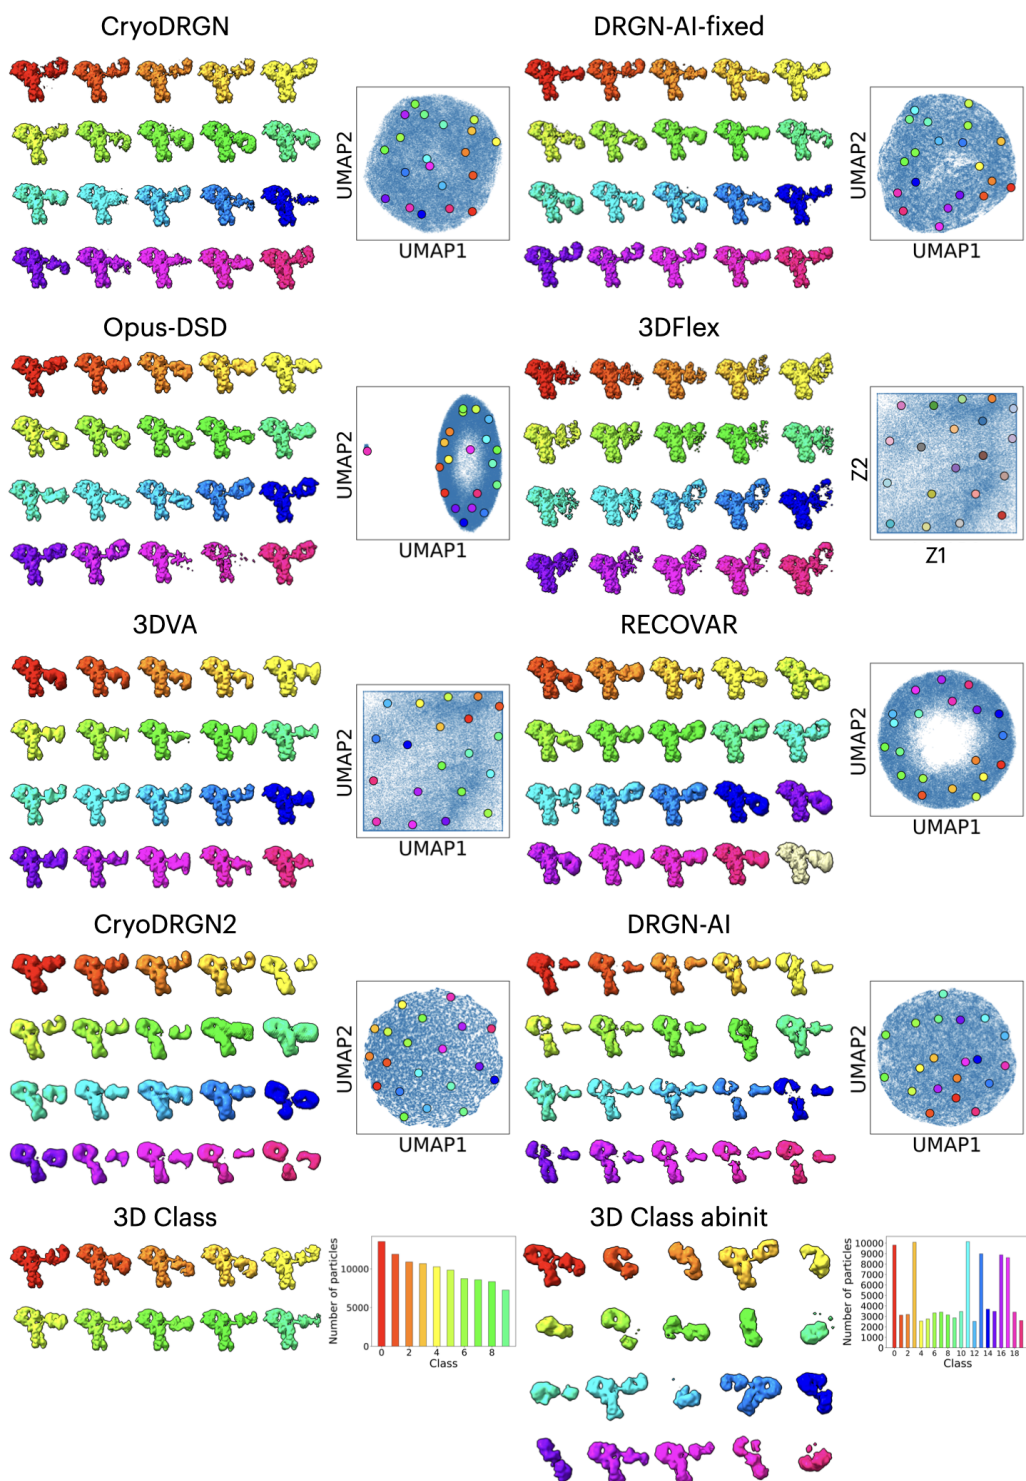

Figure 24: **Qualitative Results (IgG-1D noisiest)**. For each method, representative volumes and a UMAP plot of the latent space are shown. Volumes correspond to K-Means cluster centers with  $K=20$ . Cluster centers are marked on the UMAP plot with a dot of the corresponding color. Class volumes and particle counts are shown for 3D Classification.

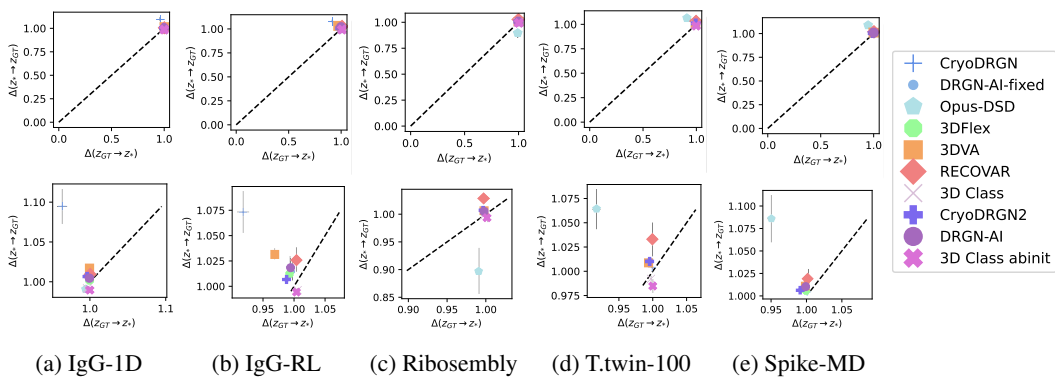

Figure 25: **Pose Information Imbalance.** In full view ( $[0, 1]^2$ ; top row) and zoomed in (bottom row).

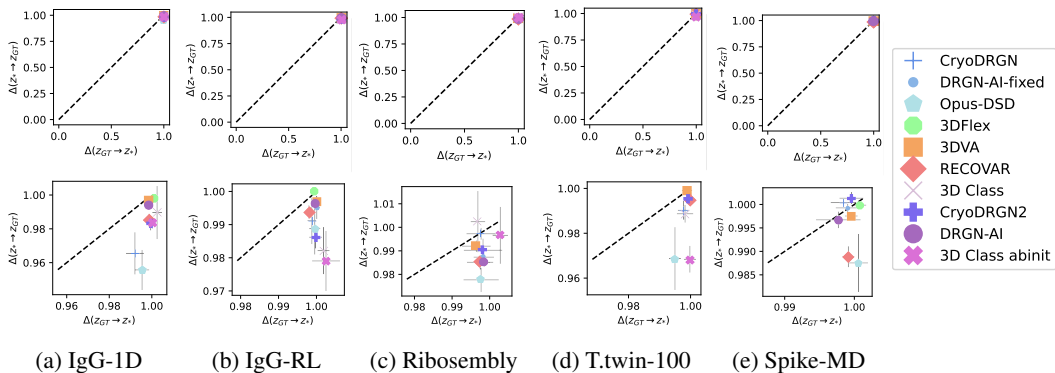

Figure 26: **CTF Information Imbalance.** In full view ( $[0, 1]^2$ ; top row) and zoomed in (bottom row).

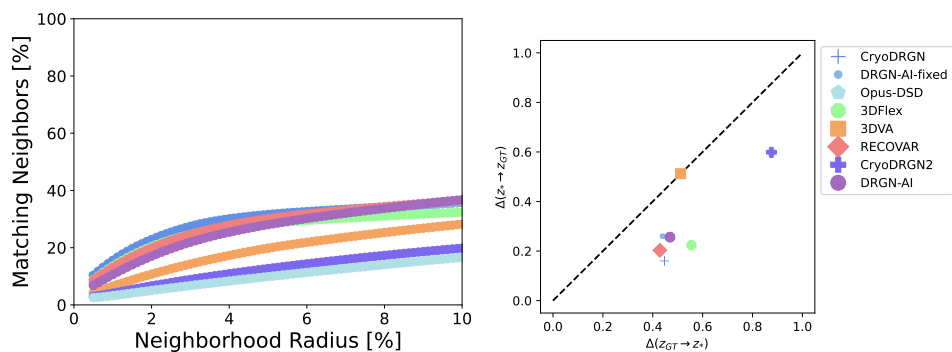

Figure 27: **Embedding metric results for the Spike-MD dataset** (left) Neighborhood similarity as a function of the neighborhood radius [%]. (right) Information Imbalance. CryoDRGN2 (not visible) is underneath Opus-DSD.

## 814 E Glossary of Terms from Single-Particle Electron Cryo-Microscopy

### 815 E.1 Sample

- 816 • **Biomolecular:** Pertaining to molecules involved in the biological processes of living  
817 organisms, such as proteins and nucleic acids.
- 818 • **Protein:** Large, complex molecules made up of amino acids, essential for various biological  
819 functions like catalyzing metabolic reactions and DNA replication.
- 820 • **Nucleic Acid:** A type of biomolecule, including (deoxy)ribonucleic acid (DNA, RNA,  
821 respectively). This term can refer to a single unit that can polymerize (form a long chain).
- 822 • **Specimen:** The biological sample that is the object of investigation.
- 823 • **Complex:** In the context of biomolecular complexes, the term ‘complex’ refers to a stable  
824 association of two or more biomolecules that interact with each other, typically to perform  
825 a specific biological function. The interactions that hold these molecules together can  
826 be non-covalent, such as hydrogen bonds, ionic interactions, van der Waals forces, and  
827 hydrophobic effects, or covalent, such as disulfide bonds.
- 828 • **Subunit:** a part of a larger whole. The part (domain, polypeptide) is contextual to the whole  
829 (domain, protein complex).

### 830 E.2 Data Source

- 831 • **Real, Experimental, Empirical:** Data based on observed and measured phenomena, derived  
832 from real-world evidence rather than theory or pure logic.
- 833 • **Synthetic, Simulated:** Data generated by algorithms or models, mimicking real-world data  
834 for testing and training purposes.
- 835 • **Protein Data Bank (PDB):** A publicly accessible database for the three-dimensional  
836 structural data of large biological molecules such as proteins and nucleic acids. Atomic  
837 models are indexed by alphanumeric codes, and in this work we list them in the SI.

### 838 E.3 Heterogeneity

- 839 • **Heterogeneity:** The presence of variations in shape or the presence or absence of mass  
840 within a sample. Coming in two main sub-classes
  - 841 – **Compositional:** Related to the total amount of mass and their proportions within a  
842 sample or structure. Often used in the context of discrete differences in total mass.
  - 843 – **Conformational:** Pertaining to the various shapes or structures that a molecule can  
844 adopt. Often used in the context of continuous movement in 3D space.
- 845 • **3D Structure:** The spatial form or shape of an object, which in the context of cryo-EM refers  
846 to the 3D structure of biomolecules. Often contrasted with the sequence of a biomolecule,  
847 or schematic (e.g. 2D) representations communicating atom type of bond connectivity.
- 848 • **Conformation:** The specific three-dimensional arrangement of atoms in a molecule. Often  
849 employed in the plural to refer to the different shapes a particular biomolecule can adopt.
- 850 • **Collective Variable (CV):** A parameter used to describe the state of a system, typically in  
851 terms of a few degrees of freedom. Further distinguished into geometric (centre of mass,  
852 angle, distance) and abstract [54]. The term CV is related to ‘order parameter’, and ‘reaction  
853 coordinate’, which is often used in the context of reactants and products in chemical catalysis  
854 [55]. However, as employed in the biomolecular simulation community, CVs typically relate  
855 to distinguishing metastable states [56].

### 856 E.4 Model and Representation

- 857 • **Angstrom (Å):** A unit of length equal to 0.1 nm, or  $10^{-10}$  m. Often used in chemistry  
858 because the distance of and between atoms is close to 1 Å.

- 859 • **Voxel:** A volume element representing an intensity value on a regular grid in three-  
860 dimensional space, similar to a pixel in 2D images but for a 3D array. A typical voxel  
861 volume ranges  $0.5^3 - 2^3 \text{ \AA}^3$ .
- 862 • **3D Map, Volume, Density, Model:** A representation of spatial data, in cryo-EM this  
863 typically refers to the 3D Coulombic (electric, electrostatic) potential instead of the electron  
864 density in other structural biology techniques based on X-ray diffraction. [57, 58]
- 865 • **Latent:** Hidden variables inferred from observed data, representing underlying structures or  
866 features in the model not directly observed.
- 867 • **Embedding:** A representation of data, for example a continuous n-dimensional vector space.  
868 Used to concretely parametrize or otherwise numerically represent a latent variable.
- 869 • **White Gaussian Noise:** noise with a flat power spectral density, meaning that its power is  
870 uniformly distributed across all frequencies. This implies that the noise has equal intensity  
871 at different frequencies, making it ‘white’ by analogy to white light, which contains all  
872 visible wavelengths.

## 873 E.5 Microscopy

- 874 • **Point Spread Function (PSF):** A function describing the response of an imaging system to  
875 a point source, indicating, for example, the system’s resolution and blur characteristics.
- 876 • **Contrast Transfer Function (CTF):** The Fourier transform of the point spread function.  
877 A mathematical description of how an electron microscope transfers contrast from the  
878 specimen to the image, influenced by various microscope parameters. We employ a common  
879 parametric form which depends on beam energy (electron wave length via the de Broglie  
880 relation), defocus and its astigmatism, spherical aberration, and amplitude contrast (ratio)  
881 ??.
- 882 • **Microscope Effects:** Artifacts and distortions introduced by the electron microscope during  
883 image acquisition. At times used in a phenomenological sense to describe effects not  
884 modelled well by the PSF/CTF.
- 885 • **Camera Effects:** Distortions or noise introduced by the optical system used to capture  
886 images. Can be used in a wide sense beyond detector effects for the entire optical system.

## 887 E.6 Image Acquisition and Analysis

- 888 • **Micrograph:** A two dimensional image obtained using an electron microscope, typically  
889 showing a field of view that includes multiple particles. Often the image contains tempo-  
890 ral frames in a ‘movie’ format, which is corrected for motion. A typical micrograph is  
891 approximately  $4000^2 \text{ pix}^2$ , at  $0.5 - 2 \text{ \AA}$  per pixel.
- 892 • **Particle:** Individual biomolecular structures captured within a patch of micrograph, which  
893 is typically boxed out of the wide frame image. Can refer to the physical entity in the image,  
894 or the recorded measurement. A typical particle is approximately  $64^2 - 512^2 \text{ pix}^2$ , at  $0.5 - 2$   
895  $\text{ \AA}$  per pixel.
- 896 • **Reconstruction:** a 3D volume, typically in a real spaced voxelized array form, generated  
897 by processing data from a series of two-dimensional 2D images. Distinguished further to  
898 homogeneous (one 3D volume) and heterogeneous (multiple 3D volume).

899 **F Broader Impact**

900 While the advancements in protein structure prediction offer tremendous potential benefits in biological discovery, there are also ethical considerations regarding data privacy, responsible technology use, and equitable access to healthcare innovations. Although our work focuses on synthetic benchmarks for Cryo-EM reconstruction tasks, it's important to note that our datasets are based on real data. Therefore, addressing these concerns is essential to ensure that deep learning technologies are deployed responsibly and ethically to maximize their positive societal impact.
